# Supplementary material for: The Role of Policy and Module Manufacturing Learning in Industrial Decarbonization by Small Modular Reactors
Source: Research Square preprint supplement (doi:10.21203/rs.3.rs-3726363/v1), 2024-01-05
Supplement: Supplementary file 1 [file 55842cbc6e7c61777078ff5d.xlsx]

## Sheet: Sheet1
Base info				Facility info				SMR Info
Discount Rate	0.07	%		Demand	93.26	MWt		Capital Cost	3652.16	$/kWt		Onsite Capital	1734.78
Natural Gas price	10	$/MMBtu		Loss percent	10	%		Fixed Cost	88.5506	$/kWt/yr		module	0	1	2	3	4	5	6	7	8	9	10	11	12
Onsite Learning	0.05	%		Temp	545	Deg C		Variable Cost	0	$/MWht		Annualized Capital Cost	2.72041e+06	2.58439e+06	2.45517e+06	2.33241e+06	2.21579e+06	2.105e+06	1.99975e+06	1.89976e+06	1.80477e+06	1.71454e+06	1.62881e+06	1.54737e+06	1.47e+06
Factory Learning	0.16	%						Capital Fraction	0.525	%
Book life	33	yrs		Total Demand	102.586	MWt		Capacity	20	MWt		Factory Capital	1917.38
CRF	0.0784081			AHF	0.69846	%		Thermal Percent	0.99	%		module	0	1	2	3	4	5	6	7	8	9	10	11	12
				Competition Price	49.5628	$/MWht		Ouptut	19.8	MWt		Annualized Capital Cost	3.00677e+06	2.52568e+06	2.12158e+06	1.78212e+06	1.49698e+06	1.25747e+06	1.05627e+06	887268	745305	626056	525887	441745	371066
Model Objective Value	90791010	$ NPV
		Natural gas only		NPV	-6.59222e+08			Optimal (from MINLP without annual limits)		NPV	-5.66446e+08	Difference	9.27755e+07	Calculated Objective	9.27755e+07	Error from optimization	0.0218582				Testing Sequential build (onsite only)		NPV	-5.83681e+08	Difference	7.55407e+07	Calculated Objective	7.55407e+07	Error from optimization	-0.167972				Testing Sequential build (full learning)		NPV	-5.53004e+08	Difference	1.06218e+08	Calculated Objective	1.06218e+08	Error from optimization	0.169913
Year	year n	Discount Factor	Natural Gas demand (annual)	NG Cost	Discounted			Operational Modules	Installed Capacity	Heat Revenues	Natural Gas demand	Natural Gas Cost	Annualized Capital Cost	Fixed Cost	Annual Expendtirures	Discounted	Obj Annual	Obj Annual Discounted			Operational Modules	Installed Capacity	Heat Revenues	Natural Gas demand	Natural Gas Cost	Annualized Capital Cost	Fixed Cost	Annual Expendtirures	Discounted	Obj Annual	Obj Annual Discounted			Operational Modules	Installed Capacity	Heat Revenues	Natural Gas demand	Natural Gas Cost	Annualized Capital Cost	Fixed Cost	Annual Expendtirures	Discounted	Obj Annual	Obj Annual Discounted
2030	0	1	898653	4.45398e+07	4.45398e+07			0	0	0	898653	4.45398e+07	0	0	4.45398e+07	4.45398e+07	0	0			0	0	0	898653	4.45398e+07	0	0	4.45398e+07	4.45398e+07	0	0			0	0	0	898653	4.45398e+07	0	0	4.45398e+07	4.45398e+07	0	0
2031	1	0.934579	898653	4.45398e+07	4.16259e+07			0	0	0	898653	4.45398e+07	2.00451e+07	0	6.45849e+07	6.03597e+07	-2.00451e+07	-1.87338e+07			0	0	0	898653	4.45398e+07	4.00902e+06	0	4.85488e+07	4.53727e+07	-4.00902e+06	-3.74675e+06			0	0	0	898653	4.45398e+07	4.00902e+06	0	4.85488e+07	4.53727e+07	-4.00902e+06	-3.74675e+06
2032	2	0.873439	898653	4.45398e+07	3.89028e+07			0	0	0	898653	4.45398e+07	2.00451e+07	0	6.45849e+07	5.64109e+07	-2.00451e+07	-1.75082e+07			0	0	0	898653	4.45398e+07	7.92283e+06	0	5.24626e+07	4.58229e+07	-7.92283e+06	-6.92011e+06			0	0	0	898653	4.45398e+07	7.58607e+06	0	5.21258e+07	4.55287e+07	-7.58607e+06	-6.62597e+06
2033	3	0.816298	898653	4.45398e+07	3.63577e+07			0	0	0	898653	4.45398e+07	2.00451e+07	0	6.45849e+07	5.27205e+07	-2.00451e+07	-1.63628e+07			0	0	0	898653	4.45398e+07	1.17462e+07	0	5.62859e+07	4.59461e+07	-1.17462e+07	-9.58839e+06			0	0	0	898653	4.45398e+07	1.07898e+07	0	5.53296e+07	4.51654e+07	-1.07898e+07	-8.80769e+06
2034	4	0.762895	898653	4.45398e+07	3.39792e+07			5	99	4.29828e+07	31413.4	1.55693e+06	2.00451e+07	8855055	3.04571e+07	2.32356e+07	1.40827e+07	1.07436e+07			1	19.8	8.59657e+06	725205	3.59432e+07	1.54836e+07	1771011	5.31978e+07	4.05844e+07	-8.65806e+06	-6.60519e+06			1	19.8	8.59657e+06	725205	3.59432e+07	1.367e+07	1771011	5.13842e+07	3.92007e+07	-6.84441e+06	-5.22157e+06
2035	5	0.712986	898653	4.45398e+07	3.17562e+07			5	99	4.29828e+07	31413.4	1.55693e+06	2.00451e+07	8855055	3.04571e+07	2.17155e+07	1.40827e+07	1.00407e+07			2	39.6	1.71931e+07	551757	2.73466e+07	2.07062e+07	3542022	5.15948e+07	3.67864e+07	-7.05506e+06	-5.03016e+06			2	39.6	1.71931e+07	551757	2.73466e+07	1.78357e+07	3542022	4.87243e+07	3.47398e+07	-4.18457e+06	-2.98354e+06
2036	6	0.666342	898653	4.45398e+07	2.96787e+07			5	99	4.29828e+07	31413.4	1.55693e+06	2.00451e+07	8855055	3.04571e+07	2.02949e+07	1.40827e+07	9.38387e+06			3	59.4	2.57897e+07	378309	1.87501e+07	2.07062e+07	5313033	4.47693e+07	2.98317e+07	-229506	-152930			3	59.4	2.57897e+07	378309	1.87501e+07	1.78357e+07	5313033	4.18988e+07	2.79189e+07	2.64099e+06	1.7598e+06
2037	7	0.62275	898653	4.45398e+07	2.77371e+07			5	99	4.29828e+07	31413.4	1.55693e+06	2.00451e+07	8855055	3.04571e+07	1.89672e+07	1.40827e+07	8.76997e+06			4	79.2	3.43863e+07	204861	1.01535e+07	2.07062e+07	7084044	3.79437e+07	2.36294e+07	6.59605e+06	4.10769e+06			4	79.2	3.43863e+07	204861	1.01535e+07	1.78357e+07	7084044	3.50732e+07	2.18418e+07	9.46654e+06	5.89529e+06
2038	8	0.582009	898653	4.45398e+07	2.59225e+07			5	99	4.29828e+07	31413.4	1.55693e+06	2.00451e+07	8855055	3.04571e+07	1.77263e+07	1.40827e+07	8.19623e+06			5	99	4.29828e+07	31413.4	1.55693e+06	2.07062e+07	8855055	3.11182e+07	1.81111e+07	1.34216e+07	7.81149e+06			5	99	4.29828e+07	31413.4	1.55693e+06	1.78357e+07	8855055	2.82477e+07	1.64404e+07	1.62921e+07	9.48215e+06
2039	9	0.543934	898653	4.45398e+07	2.42267e+07			5	99	4.29828e+07	31413.4	1.55693e+06	2.00451e+07	8855055	3.04571e+07	1.65666e+07	1.40827e+07	7.66003e+06			5	99	4.29828e+07	31413.4	1.55693e+06	2.07062e+07	8855055	3.11182e+07	1.69262e+07	1.34216e+07	7.30046e+06			5	99	4.29828e+07	31413.4	1.55693e+06	1.78357e+07	8855055	2.82477e+07	1.53649e+07	1.62921e+07	8.86182e+06
2040	10	0.508349	898653	4.45398e+07	2.26418e+07			5	99	4.29828e+07	31413.4	1.55693e+06	2.00451e+07	8855055	3.04571e+07	1.54828e+07	1.40827e+07	7.15891e+06			5	99	4.29828e+07	31413.4	1.55693e+06	2.07062e+07	8855055	3.11182e+07	1.58189e+07	1.34216e+07	6.82286e+06			5	99	4.29828e+07	31413.4	1.55693e+06	1.78357e+07	8855055	2.82477e+07	1.43597e+07	1.62921e+07	8.28207e+06
2041	11	0.475093	898653	4.45398e+07	2.11605e+07			5	99	4.29828e+07	31413.4	1.55693e+06	2.00451e+07	8855055	3.04571e+07	1.447e+07	1.40827e+07	6.69057e+06			5	99	4.29828e+07	31413.4	1.55693e+06	2.07062e+07	8855055	3.11182e+07	1.4784e+07	1.34216e+07	6.37651e+06			5	99	4.29828e+07	31413.4	1.55693e+06	1.78357e+07	8855055	2.82477e+07	1.34203e+07	1.62921e+07	7.74026e+06
2042	12	0.444012	898653	4.45398e+07	1.97762e+07			5	99	4.29828e+07	31413.4	1.55693e+06	2.00451e+07	8855055	3.04571e+07	1.35233e+07	1.40827e+07	6.25287e+06			5	99	4.29828e+07	31413.4	1.55693e+06	2.07062e+07	8855055	3.11182e+07	1.38168e+07	1.34216e+07	5.95935e+06			5	99	4.29828e+07	31413.4	1.55693e+06	1.78357e+07	8855055	2.82477e+07	1.25423e+07	1.62921e+07	7.23388e+06
2043	13	0.414964	898653	4.45398e+07	1.84824e+07			5	99	4.29828e+07	31413.4	1.55693e+06	2.00451e+07	8855055	3.04571e+07	1.26386e+07	1.40827e+07	5.8438e+06			5	99	4.29828e+07	31413.4	1.55693e+06	2.07062e+07	8855055	3.11182e+07	1.29129e+07	1.34216e+07	5.56949e+06			5	99	4.29828e+07	31413.4	1.55693e+06	1.78357e+07	8855055	2.82477e+07	1.17218e+07	1.62921e+07	6.76064e+06
2044	14	0.387817	898653	4.45398e+07	1.72733e+07			5	99	4.29828e+07	31413.4	1.55693e+06	2.00451e+07	8855055	3.04571e+07	1.18118e+07	1.40827e+07	5.4615e+06			5	99	4.29828e+07	31413.4	1.55693e+06	2.07062e+07	8855055	3.11182e+07	1.20682e+07	1.34216e+07	5.20513e+06			5	99	4.29828e+07	31413.4	1.55693e+06	1.78357e+07	8855055	2.82477e+07	1.09549e+07	1.62921e+07	6.31835e+06
2045	15	0.362446	898653	4.45398e+07	1.61433e+07			5	99	4.29828e+07	31413.4	1.55693e+06	2.00451e+07	8855055	3.04571e+07	1.10391e+07	1.40827e+07	5.1042e+06			5	99	4.29828e+07	31413.4	1.55693e+06	2.07062e+07	8855055	3.11182e+07	1.12787e+07	1.34216e+07	4.86461e+06			5	99	4.29828e+07	31413.4	1.55693e+06	1.78357e+07	8855055	2.82477e+07	1.02383e+07	1.62921e+07	5.905e+06
2046	16	0.338735	898653	4.45398e+07	1.50872e+07			5	99	4.29828e+07	31413.4	1.55693e+06	2.00451e+07	8855055	3.04571e+07	1.03169e+07	1.40827e+07	4.77028e+06			5	99	4.29828e+07	31413.4	1.55693e+06	2.07062e+07	8855055	3.11182e+07	1.05408e+07	1.34216e+07	4.54636e+06			5	99	4.29828e+07	31413.4	1.55693e+06	1.78357e+07	8855055	2.82477e+07	9.56846e+06	1.62921e+07	5.5187e+06
2047	17	0.316574	898653	4.45398e+07	1.41001e+07			5	99	4.29828e+07	31413.4	1.55693e+06	2.00451e+07	8855055	3.04571e+07	9.64194e+06	1.40827e+07	4.45821e+06			5	99	4.29828e+07	31413.4	1.55693e+06	2.07062e+07	8855055	3.11182e+07	9.85121e+06	1.34216e+07	4.24894e+06			5	99	4.29828e+07	31413.4	1.55693e+06	1.78357e+07	8855055	2.82477e+07	8.94249e+06	1.62921e+07	5.15766e+06
2048	18	0.295864	898653	4.45398e+07	1.31777e+07			5	99	4.29828e+07	31413.4	1.55693e+06	2.00451e+07	8855055	3.04571e+07	9.01116e+06	1.40827e+07	4.16655e+06			5	99	4.29828e+07	31413.4	1.55693e+06	2.07062e+07	8855055	3.11182e+07	9.20674e+06	1.34216e+07	3.97097e+06			5	99	4.29828e+07	31413.4	1.55693e+06	1.78357e+07	8855055	2.82477e+07	8.35746e+06	1.62921e+07	4.82024e+06
2049	19	0.276508	898653	4.45398e+07	1.23156e+07			5	99	4.29828e+07	31413.4	1.55693e+06	2.00451e+07	8855055	3.04571e+07	8.42164e+06	1.40827e+07	3.89397e+06			5	99	4.29828e+07	31413.4	1.55693e+06	2.07062e+07	8855055	3.11182e+07	8.60443e+06	1.34216e+07	3.71118e+06			5	99	4.29828e+07	31413.4	1.55693e+06	1.78357e+07	8855055	2.82477e+07	7.81071e+06	1.62921e+07	4.5049e+06
2050	20	0.258419	898653	4.45398e+07	1.15099e+07			5	99	4.29828e+07	31413.4	1.55693e+06	2.00451e+07	8855055	3.04571e+07	7.87069e+06	1.40827e+07	3.63923e+06			5	99	4.29828e+07	31413.4	1.55693e+06	2.07062e+07	8855055	3.11182e+07	8.04152e+06	1.34216e+07	3.4684e+06			5	99	4.29828e+07	31413.4	1.55693e+06	1.78357e+07	8855055	2.82477e+07	7.29973e+06	1.62921e+07	4.21019e+06
2051	21	0.241513	898653	4.45398e+07	1.07569e+07			5	99	4.29828e+07	31413.4	1.55693e+06	2.00451e+07	8855055	3.04571e+07	7.35579e+06	1.40827e+07	3.40115e+06			5	99	4.29828e+07	31413.4	1.55693e+06	2.07062e+07	8855055	3.11182e+07	7.51544e+06	1.34216e+07	3.24149e+06			5	99	4.29828e+07	31413.4	1.55693e+06	1.78357e+07	8855055	2.82477e+07	6.82218e+06	1.62921e+07	3.93475e+06
2052	22	0.225713	898653	4.45398e+07	1.00532e+07			5	99	4.29828e+07	31413.4	1.55693e+06	2.00451e+07	8855055	3.04571e+07	6.87457e+06	1.40827e+07	3.17864e+06			5	99	4.29828e+07	31413.4	1.55693e+06	2.07062e+07	8855055	3.11182e+07	7.02378e+06	1.34216e+07	3.02943e+06			5	99	4.29828e+07	31413.4	1.55693e+06	1.78357e+07	8855055	2.82477e+07	6.37587e+06	1.62921e+07	3.67734e+06
2053	23	0.210947	898653	4.45398e+07	9.39552e+06			5	99	4.29828e+07	31413.4	1.55693e+06	2.00451e+07	8855055	3.04571e+07	6.42483e+06	1.40827e+07	2.97069e+06			5	99	4.29828e+07	31413.4	1.55693e+06	2.07062e+07	8855055	3.11182e+07	6.56428e+06	1.34216e+07	2.83125e+06			5	99	4.29828e+07	31413.4	1.55693e+06	1.78357e+07	8855055	2.82477e+07	5.95876e+06	1.62921e+07	3.43677e+06
2054	24	0.197147	898653	4.45398e+07	8.78086e+06			5	99	4.29828e+07	31413.4	1.55693e+06	2.00451e+07	8855055	3.04571e+07	6.00452e+06	1.40827e+07	2.77635e+06			5	99	4.29828e+07	31413.4	1.55693e+06	2.07062e+07	8855055	3.11182e+07	6.13484e+06	1.34216e+07	2.64602e+06			5	99	4.29828e+07	31413.4	1.55693e+06	1.78357e+07	8855055	2.82477e+07	5.56893e+06	1.62921e+07	3.21193e+06
2055	25	0.184249	898653	4.45398e+07	8.20641e+06			5	99	4.29828e+07	31413.4	1.55693e+06	2.00451e+07	8855055	3.04571e+07	5.6117e+06	1.40827e+07	2.59472e+06			5	99	4.29828e+07	31413.4	1.55693e+06	2.07062e+07	8855055	3.11182e+07	5.73349e+06	1.34216e+07	2.47292e+06			5	99	4.29828e+07	31413.4	1.55693e+06	1.78357e+07	8855055	2.82477e+07	5.20461e+06	1.62921e+07	3.0018e+06
2056	26	0.172195	898653	4.45398e+07	7.66955e+06			5	99	4.29828e+07	31413.4	1.55693e+06	2.00451e+07	8855055	3.04571e+07	5.24458e+06	1.40827e+07	2.42497e+06			5	99	4.29828e+07	31413.4	1.55693e+06	2.07062e+07	8855055	3.11182e+07	5.35841e+06	1.34216e+07	2.31114e+06			5	99	4.29828e+07	31413.4	1.55693e+06	1.78357e+07	8855055	2.82477e+07	4.86412e+06	1.62921e+07	2.80543e+06
2057	27	0.16093	898653	4.45398e+07	7.1678e+06			5	99	4.29828e+07	31413.4	1.55693e+06	2.00451e+07	8855055	3.04571e+07	4.90147e+06	1.40827e+07	2.26633e+06			5	99	4.29828e+07	31413.4	1.55693e+06	2.07062e+07	8855055	3.11182e+07	5.00786e+06	1.34216e+07	2.15994e+06			5	99	4.29828e+07	31413.4	1.55693e+06	1.78357e+07	8855055	2.82477e+07	4.54591e+06	1.62921e+07	2.62189e+06
2058	28	0.150402	898653	4.45398e+07	6.69888e+06			5	99	4.29828e+07	31413.4	1.55693e+06	2.00451e+07	8855055	3.04571e+07	4.58082e+06	1.40827e+07	2.11806e+06			5	99	4.29828e+07	31413.4	1.55693e+06	2.07062e+07	8855055	3.11182e+07	4.68024e+06	1.34216e+07	2.01864e+06			5	99	4.29828e+07	31413.4	1.55693e+06	1.78357e+07	8855055	2.82477e+07	4.24851e+06	1.62921e+07	2.45037e+06
2059	29	0.140563	898653	4.45398e+07	6.26063e+06			5	99	4.29828e+07	31413.4	1.55693e+06	2.00451e+07	8855055	3.04571e+07	4.28114e+06	1.40827e+07	1.9795e+06			5	99	4.29828e+07	31413.4	1.55693e+06	2.07062e+07	8855055	3.11182e+07	4.37406e+06	1.34216e+07	1.88658e+06			5	99	4.29828e+07	31413.4	1.55693e+06	1.78357e+07	8855055	2.82477e+07	3.97057e+06	1.62921e+07	2.29006e+06
2060	30	0.131367	898653	4.45398e+07	5.85106e+06			5	99	4.29828e+07	31413.4	1.55693e+06	2.00451e+07	8855055	3.04571e+07	4.00106e+06	1.40827e+07	1.85e+06			5	99	4.29828e+07	31413.4	1.55693e+06	2.07062e+07	8855055	3.11182e+07	4.0879e+06	1.34216e+07	1.76316e+06			5	99	4.29828e+07	31413.4	1.55693e+06	1.78357e+07	8855055	2.82477e+07	3.71081e+06	1.62921e+07	2.14025e+06
2061	31	0.122773	898653	4.45398e+07	5.46828e+06			5	99	4.29828e+07	31413.4	1.55693e+06	2.00451e+07	8855055	3.04571e+07	3.73931e+06	1.40827e+07	1.72897e+06			5	99	4.29828e+07	31413.4	1.55693e+06	2.07062e+07	8855055	3.11182e+07	3.82047e+06	1.34216e+07	1.64781e+06			5	99	4.29828e+07	31413.4	1.55693e+06	1.78357e+07	8855055	2.82477e+07	3.46805e+06	1.62921e+07	2.00023e+06
2062	32	0.114741	898653	4.45398e+07	5.11054e+06			5	99	4.29828e+07	31413.4	1.55693e+06	2.00451e+07	8855055	3.04571e+07	3.49468e+06	1.40827e+07	1.61586e+06			5	99	4.29828e+07	31413.4	1.55693e+06	2.07062e+07	8855055	3.11182e+07	3.57053e+06	1.34216e+07	1.54001e+06			5	99	4.29828e+07	31413.4	1.55693e+06	1.78357e+07	8855055	2.82477e+07	3.24117e+06	1.62921e+07	1.86937e+06
2063	33	0.107235	898653	4.45398e+07	4.77621e+06			5	99	4.29828e+07	31413.4	1.55693e+06	2.00451e+07	8855055	3.04571e+07	3.26606e+06	1.40827e+07	1.51015e+06			5	99	4.29828e+07	31413.4	1.55693e+06	2.07062e+07	8855055	3.11182e+07	3.33695e+06	1.34216e+07	1.43926e+06			5	99	4.29828e+07	31413.4	1.55693e+06	1.78357e+07	8855055	2.82477e+07	3.02913e+06	1.62921e+07	1.74708e+06
2064	34	0.100219	898653	4.45398e+07	4.46375e+06			5	99	4.29828e+07	31413.4	1.55693e+06	2.00451e+07	8855055	3.04571e+07	3.05239e+06	1.40827e+07	1.41135e+06			5	99	4.29828e+07	31413.4	1.55693e+06	2.07062e+07	8855055	3.11182e+07	3.11864e+06	1.34216e+07	1.3451e+06			5	99	4.29828e+07	31413.4	1.55693e+06	1.78357e+07	8855055	2.82477e+07	2.83096e+06	1.62921e+07	1.63278e+06
2065	35	0.0936629	898653	4.45398e+07	4.17172e+06			5	99	4.29828e+07	31413.4	1.55693e+06	2.00451e+07	8855055	3.04571e+07	2.8527e+06	1.40827e+07	1.31902e+06			5	99	4.29828e+07	31413.4	1.55693e+06	2.07062e+07	8855055	3.11182e+07	2.91462e+06	1.34216e+07	1.25711e+06			5	99	4.29828e+07	31413.4	1.55693e+06	1.78357e+07	8855055	2.82477e+07	2.64576e+06	1.62921e+07	1.52597e+06
2066	36	0.0875355	898653	4.45398e+07	3.89881e+06			0	0	0	898653	4.45398e+07	0	0	4.45398e+07	3.89881e+06	0	0			4	79.2	3.43863e+07	204861	1.01535e+07	1.66971e+07	7084044	3.39347e+07	2.97049e+06	1.06051e+07	928320			4	79.2	3.43863e+07	204861	1.01535e+07	1.36823e+07	7084044	3.09199e+07	2.70659e+06	1.36199e+07	1.19222e+06
2067	37	0.0818088	898653	4.45398e+07	3.64375e+06			0	0	0	898653	4.45398e+07	0	0	4.45398e+07	3.64375e+06	0	0			3	59.4	2.57897e+07	378309	1.87501e+07	1.27833e+07	5313033	3.68464e+07	3.01436e+06	7.69333e+06	629382			3	59.4	2.57897e+07	378309	1.87501e+07	9.98404e+06	5313033	3.40471e+07	2.78536e+06	1.04926e+07	858389
2068	38	0.0764569	898653	4.45398e+07	3.40537e+06			0	0	0	898653	4.45398e+07	0	0	4.45398e+07	3.40537e+06	0	0			2	39.6	1.71931e+07	551757	2.73466e+07	8.95998e+06	3542022	3.98486e+07	3.0467e+06	4.69113e+06	358669			2	39.6	1.71931e+07	551757	2.73466e+07	6.67849e+06	3542022	3.75671e+07	2.87227e+06	6.97262e+06	533105
2069	39	0.071455	898653	4.45398e+07	3.18259e+06			0	0	0	898653	4.45398e+07	0	0	4.45398e+07	3.18259e+06	0	0			1	19.8	8.59657e+06	725205	3.59432e+07	5.22256e+06	1771011	4.29368e+07	3.06805e+06	1.603e+06	114542			1	19.8	8.59657e+06	725205	3.59432e+07	3.71277e+06	1771011	4.1427e+07	2.96017e+06	3.11278e+06	222424
2070	40	0.0667804	898653	4.45398e+07	2.97438e+06			0	0	0	898653	4.45398e+07	0	0	4.45398e+07	2.97438e+06	0	0			0	0	0	898653	4.45398e+07	0	0	4.45398e+07	2.97438e+06	0	0			0	0	0	898653	4.45398e+07	0	0	4.45398e+07	2.97438e+06	0	0
2071	41	0.0624116	898653	4.45398e+07	2.7798e+06			0	0	0	898653	4.45398e+07	0	0	4.45398e+07	2.7798e+06	0	0			0	0	0	898653	4.45398e+07	0	0	4.45398e+07	2.7798e+06	0	0			0	0	0	898653	4.45398e+07	0	0	4.45398e+07	2.7798e+06	0	0
2072	42	0.0583286	898653	4.45398e+07	2.59794e+06			0	0	0	898653	4.45398e+07	0	0	4.45398e+07	2.59794e+06	0	0			0	0	0	898653	4.45398e+07	0	0	4.45398e+07	2.59794e+06	0	0			0	0	0	898653	4.45398e+07	0	0	4.45398e+07	2.59794e+06	0	0
2073	43	0.0545127	898653	4.45398e+07	2.42798e+06			0	0	0	898653	4.45398e+07	0	0	4.45398e+07	2.42798e+06	0	0			0	0	0	898653	4.45398e+07	0	0	4.45398e+07	2.42798e+06	0	0			0	0	0	898653	4.45398e+07	0	0	4.45398e+07	2.42798e+06	0	0
2074	44	0.0509464	898653	4.45398e+07	2.26914e+06			0	0	0	898653	4.45398e+07	0	0	4.45398e+07	2.26914e+06	0	0			0	0	0	898653	4.45398e+07	0	0	4.45398e+07	2.26914e+06	0	0			0	0	0	898653	4.45398e+07	0	0	4.45398e+07	2.26914e+06	0	0
2075	45	0.0476135	898653	4.45398e+07	2.12069e+06			0	0	0	898653	4.45398e+07	0	0	4.45398e+07	2.12069e+06	0	0			0	0	0	898653	4.45398e+07	0	0	4.45398e+07	2.12069e+06	0	0			0	0	0	898653	4.45398e+07	0	0	4.45398e+07	2.12069e+06	0	0
2076	46	0.0444986	898653	4.45398e+07	1.98196e+06			0	0	0	898653	4.45398e+07	0	0	4.45398e+07	1.98196e+06	0	0			0	0	0	898653	4.45398e+07	0	0	4.45398e+07	1.98196e+06	0	0			0	0	0	898653	4.45398e+07	0	0	4.45398e+07	1.98196e+06	0	0
2077	47	0.0415875	898653	4.45398e+07	1.8523e+06			0	0	0	898653	4.45398e+07	0	0	4.45398e+07	1.8523e+06	0	0			0	0	0	898653	4.45398e+07	0	0	4.45398e+07	1.8523e+06	0	0			0	0	0	898653	4.45398e+07	0	0	4.45398e+07	1.8523e+06	0	0
2078	48	0.0388668	898653	4.45398e+07	1.73112e+06			0	0	0	898653	4.45398e+07	0	0	4.45398e+07	1.73112e+06	0	0			0	0	0	898653	4.45398e+07	0	0	4.45398e+07	1.73112e+06	0	0			0	0	0	898653	4.45398e+07	0	0	4.45398e+07	1.73112e+06	0	0
2079	49	0.0363241	898653	4.45398e+07	1.61787e+06			0	0	0	898653	4.45398e+07	0	0	4.45398e+07	1.61787e+06	0	0	9.27755e+07		0	0	0	898653	4.45398e+07	0	0	4.45398e+07	1.61787e+06	0	0			0	0	0	898653	4.45398e+07	0	0	4.45398e+07	1.61787e+06	0	0
2080	50	0.0339478	898653	4.45398e+07	1.51203e+06			0	0	0	898653	4.45398e+07	0	0	4.45398e+07	1.51203e+06	0	0	9.27755e+07		0	0	0	898653	4.45398e+07	0	0	4.45398e+07	1.51203e+06	0	0			0	0	0	898653	4.45398e+07	0	0	4.45398e+07	1.51203e+06	0	0
